# Supplementary material for: Edge hydrogenation-induced spin-filtering and negative differential resistance effects in zigzag silicene nanoribbons with line defects
Source: Royal Society of Chemistry journal article supplement (doi:10.1039/c7ra02624b), 2017-01-01
Supplement: c7ra02624b1.pdf [file c7ra02624b1.pdf]

## Electronic Supplementary Information

# Edge Hydrogenation-Induced Spin-Filtering and Negative Differential Resistance Effects in Zigzag Silicene Nanoribbons with Line Defects

Xiaoteng Li <sup>a</sup>, Dongqing Zou <sup>a</sup>, Bin Cui <sup>a</sup>, Changfeng Fang <sup>b</sup>, Jingfen Zhao <sup>a</sup>, Dongmei Li <sup>a\*</sup>, Desheng Liu <sup>a, b, \*</sup>

<sup>a</sup> School of Physics, State Key Laboratory of Crystal Materials, Shandong University, Jinan 250100, People's Republic of China. E-mail: liuds@sdu.edu.cn

<sup>b</sup> Department of Physics, Jining University, Qufu 273155, People's Republic of China

---

\* Corresponding authors.  
Email address: li\_dm@sdu.edu.cn  
\* Corresponding authors.  
Email address: liuds@sdu.edu.cn

The edge energy is defined as  $E_{edge} = (E_{total} - n_{Si}E_{Si} - n_{H}E_{H})/(2L_{edge})$ ,  $E_{total}$  is the total energy of each system,  $n_{Si}$  and  $n_{H}$  are the number of Si and H atoms in nanoribbons, and  $E_{Si}$  and  $E_{H}$  are the energies of Si and H atoms in the silicene sheet and H<sub>2</sub> molecule, respectively.  $L_{edge}$  is the length of edge and the coefficient 2 accounts for the two edges of nanoribbons.<sup>1</sup> For 558-defect and 57-defect ZSiNRs, the edge energy decreases with increasing the number of H atoms. Their most stable edge types are M5 and M10 that the two edges are terminated by two H atoms.

**Table S1** The edge energies of M2-M5 and M7-M10.

|                                | <b>M2</b>    | <b>M3</b>     | <b>M4</b>     | <b>M5</b>     | <b>M7</b>    | <b>M8</b>     | <b>M9</b>     | <b>M10</b>    |
|--------------------------------|--------------|---------------|---------------|---------------|--------------|---------------|---------------|---------------|
| <b>E<sub>edge</sub> (eV/Å)</b> | <b>0.021</b> | <b>-0.091</b> | <b>-0.121</b> | <b>-0.232</b> | <b>0.050</b> | <b>-0.066</b> | <b>-0.098</b> | <b>-0.213</b> |

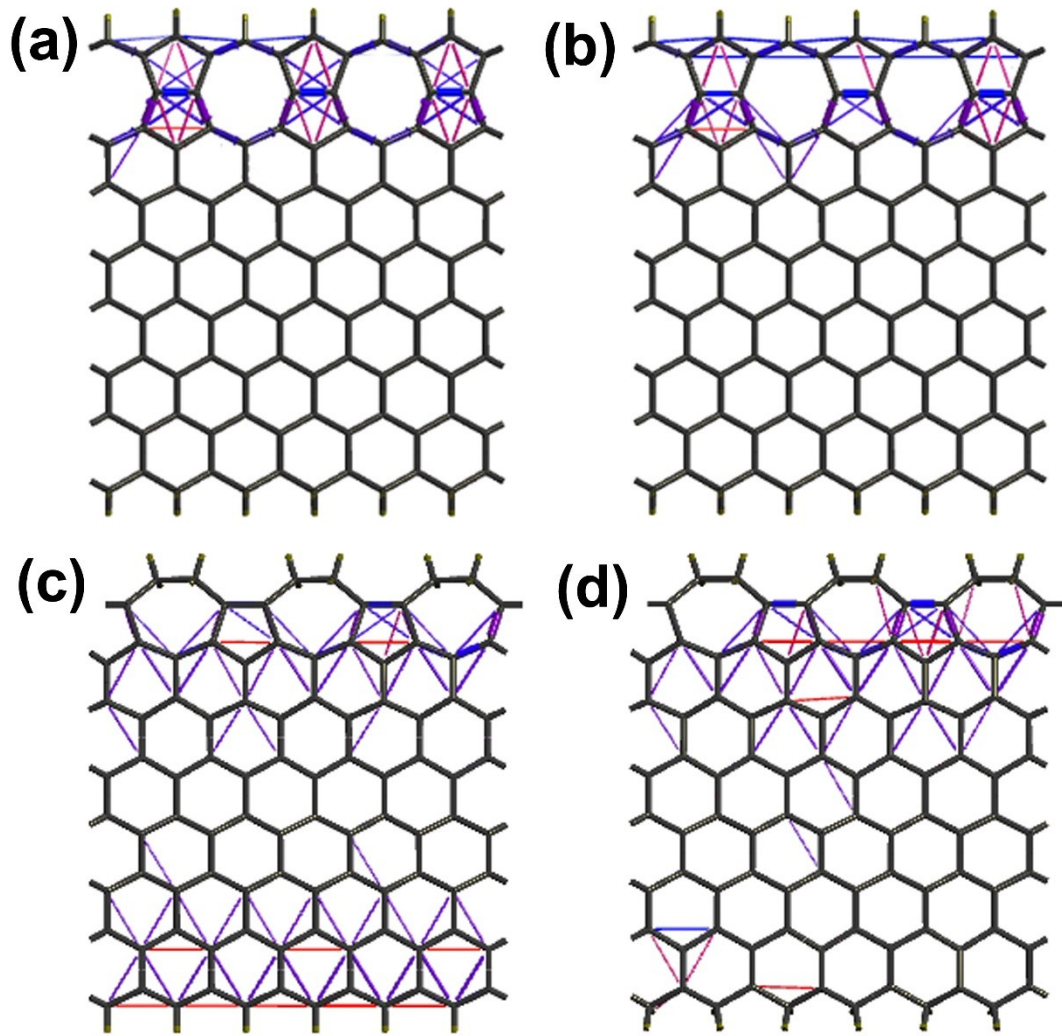

Fig. S1 Transmission pathways for (a) and (b) spin-up and spin-down of M3 at 0 eV energy with 0.2 V, (c) spin-up of M9 at 0 eV energy with 0.3 V, (d) spin-down of M10 at 0.1 eV energy with 0.3 V.

## References

1. Y. Ding and Y. Wang, *Applied Physics Letters*, 2014, **104**, 083111.
